# Supplementary material for: Synthesis of poly(allyl 2-ylidene-acetate) and subsequent post-polymerization modification via thiol–ene reaction
Source: Royal Society of Chemistry journal article supplement (doi:10.1039/c6py00818f), 2016-01-01
Supplement: c6py00818f1.pdf [file c6py00818f1.pdf]

## SUPPORTING INFORMATION

### **Synthesis of poly(allyl 2-ylidene-acetate) and subsequent post-polymerization modification via thiol-ene reaction**

*Tim Krappitz, Daniel Brauer, Patrick Theato\**

Department of Chemistry, Institute for Technical and Macromolecular Chemistry, University of Hamburg, D-20146 Hamburg, Germany

Correspondence to: P. Theato (theato@chemie.uni-hamburg.de)

|                                                        |   |
|--------------------------------------------------------|---|
| Spectral data of allyl 2-diazoacetate .....            | 2 |
| Real-time in-situ FT-IR (masked points included) ..... | 3 |
| Spectral data for PAA after bromination .....          | 4 |

## Spectral data of allyl 2-diazoacetate

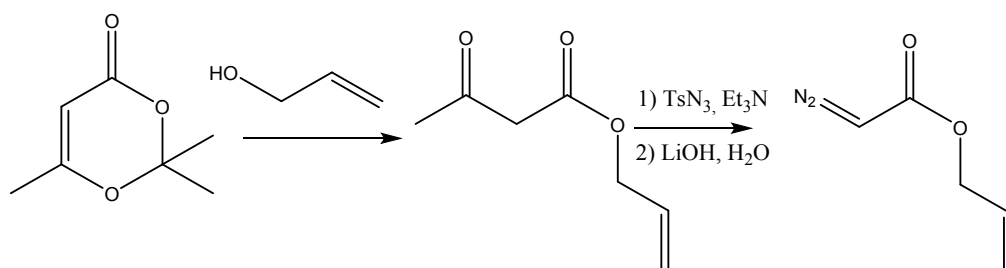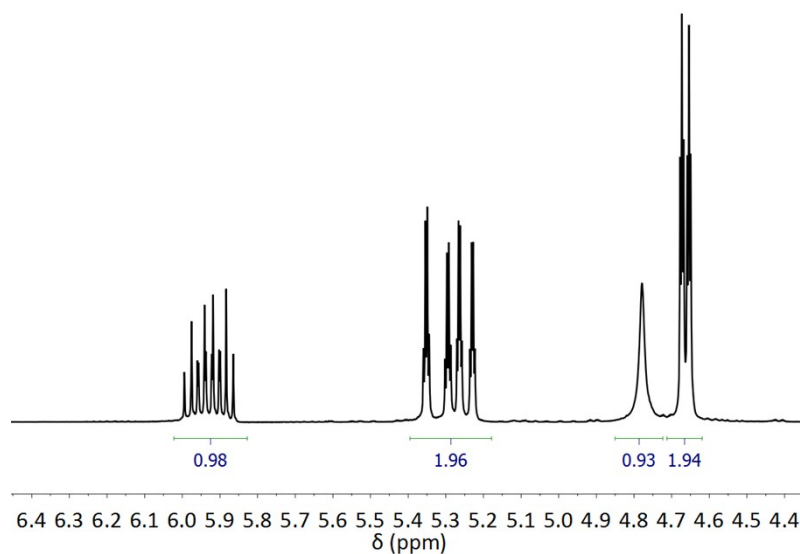

Figure S1.  $^1\text{H}$  NMR spectrum of allyl 2-diazoacetate in  $\text{CDCl}_3$  (300MHz spectrum).

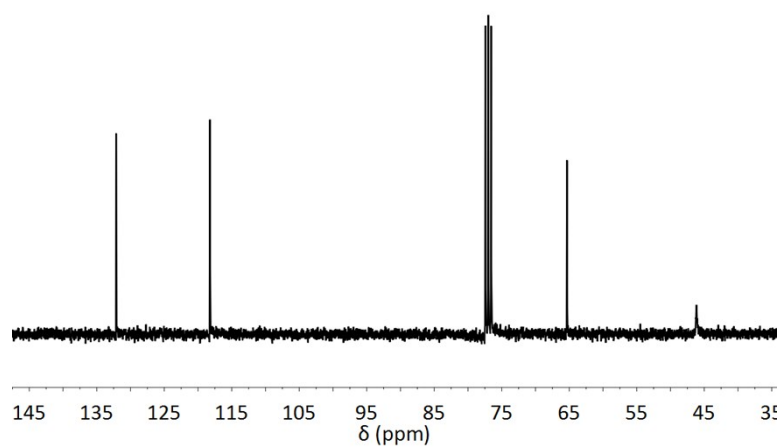

Figure S2.  $^{13}\text{C}$  NMR spectrum of allyl 2-diazoacetate in  $\text{CDCl}_3$  (75MHz spectrum).

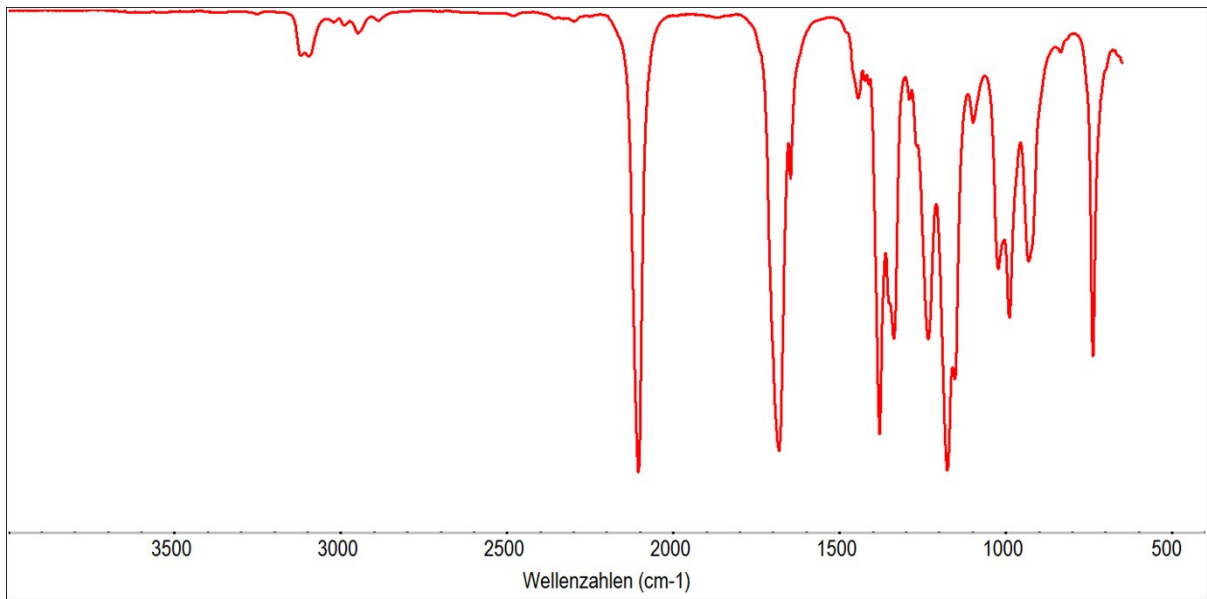

Figure S3. FT-IR spectrum of allyl 2-diazoacetate.

**Real-time in-situ FT-IR (masked points included)**

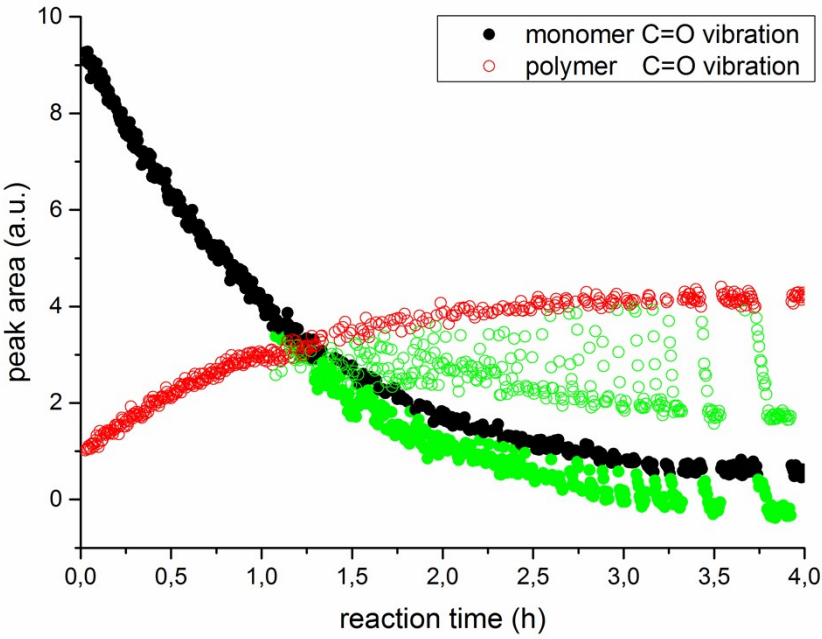

Figure S4. Peak areas of the C=O vibration modes tracked over time by real-time in-situ FT-IR spectroscopy. Black circles resemble the peak area trend of the monomer C=O vibration mode. Red open circles resemble the peak area trend of the

polymer C=O vibration mode. Green open and closed circles are masked points. Points were masked as the recorded IR signal tended to drop in intensity at later reaction times. This intensity drop was recorded for both C=O vibration modes, monomer and polymer.

## Spectral data for PAA after bromination

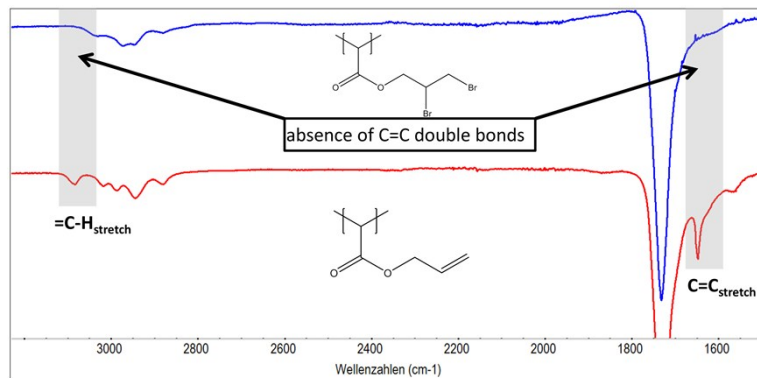

Figure S5: IR spectra of PAA before and after bromination showing quantitative conversion of double bonds. Bromination of 54.6 mg PAA in 20 mL chloroform was done by adding a large excess of bromine (1 mL) and subsequent storage in the fridge for three days. Afterwards the polymer was precipitated in methanol. The obtained polymer was insoluble in all tested solvents.
